# Supplementary material for: Low cost, high efficiency flexible supercapacitor electrodes made from areca nut husk nanocellulose and silver nanoparticle embedded polyaniline
Source: Royal Society of Chemistry journal article supplement (doi:10.1039/d1ra04920h), 2021-01-01
Supplement: d1ra04920h1.pdf [file d1ra04920h1.pdf]

## Supporting information for

# Low cost, high efficiency flexible supercapacitor electrodes made from areca nut husk nanocellulose and silver nanoparticle embedded polyaniline†

Soorya Sasi<sup>a</sup>, C. Ardra Krishna<sup>d</sup>, Sunish K. Sugunan<sup>b</sup>, Akash Chandran<sup>d</sup>, P. Radhakrishnan Nair<sup>a\*</sup>, K.R.V. Subramanian<sup>c</sup> and Suresh Mathew<sup>a,d\*</sup>

---

<sup>a</sup> Advanced Molecular Materials Research Centre, Mahatma Gandhi University, Kottayam 686 560, Kerala, India.

<sup>b</sup> Department of Chemistry, Kottayam CMS College (Autonomous) –affiliated to Mahatma Gandhi University, Kottayam 686001, Kerala, India.

<sup>c</sup> Dept. of Mechanical Engineering, Ramaiah Institute of Technology, Bangalore 560 054, India.

<sup>d</sup> School of Chemical Sciences, Mahatma Gandhi University, Priyadarshini Hills, Kottayam 686 560, Kerala, India.

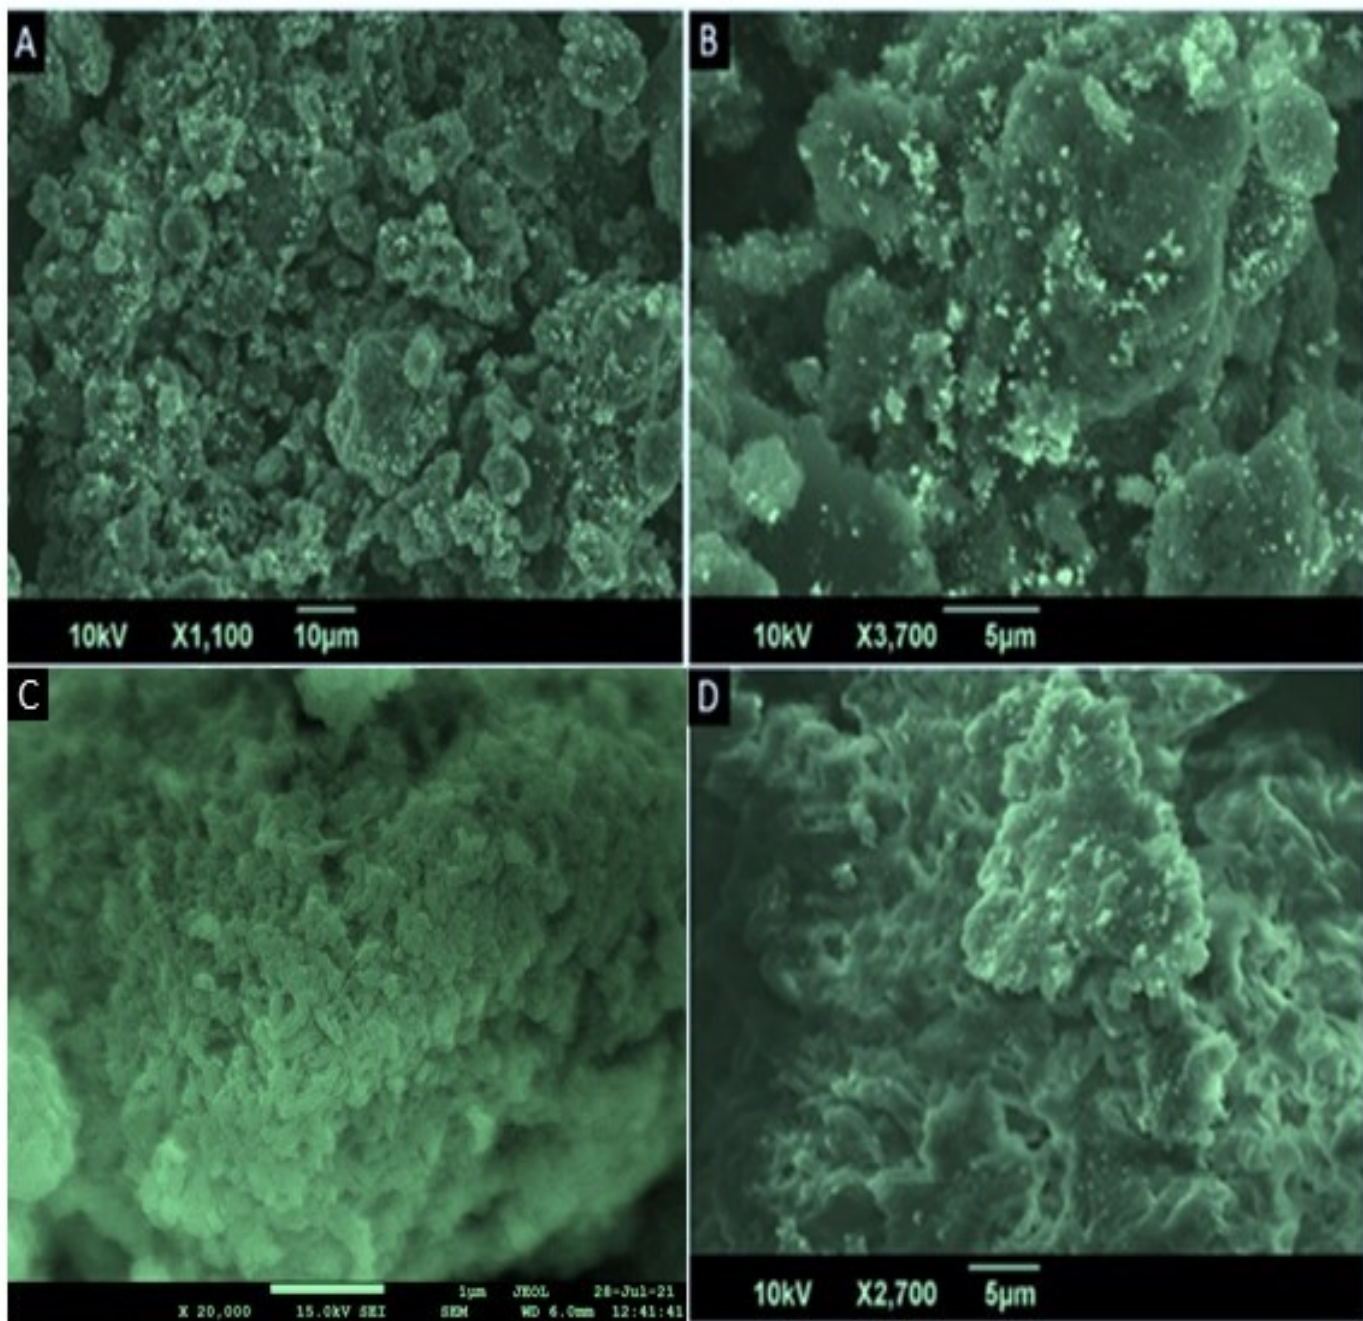

Fig. S1 SEM images of (A&B) Ag- PANI, (C) PANI-NC and (D) Ag-PANI-NC.

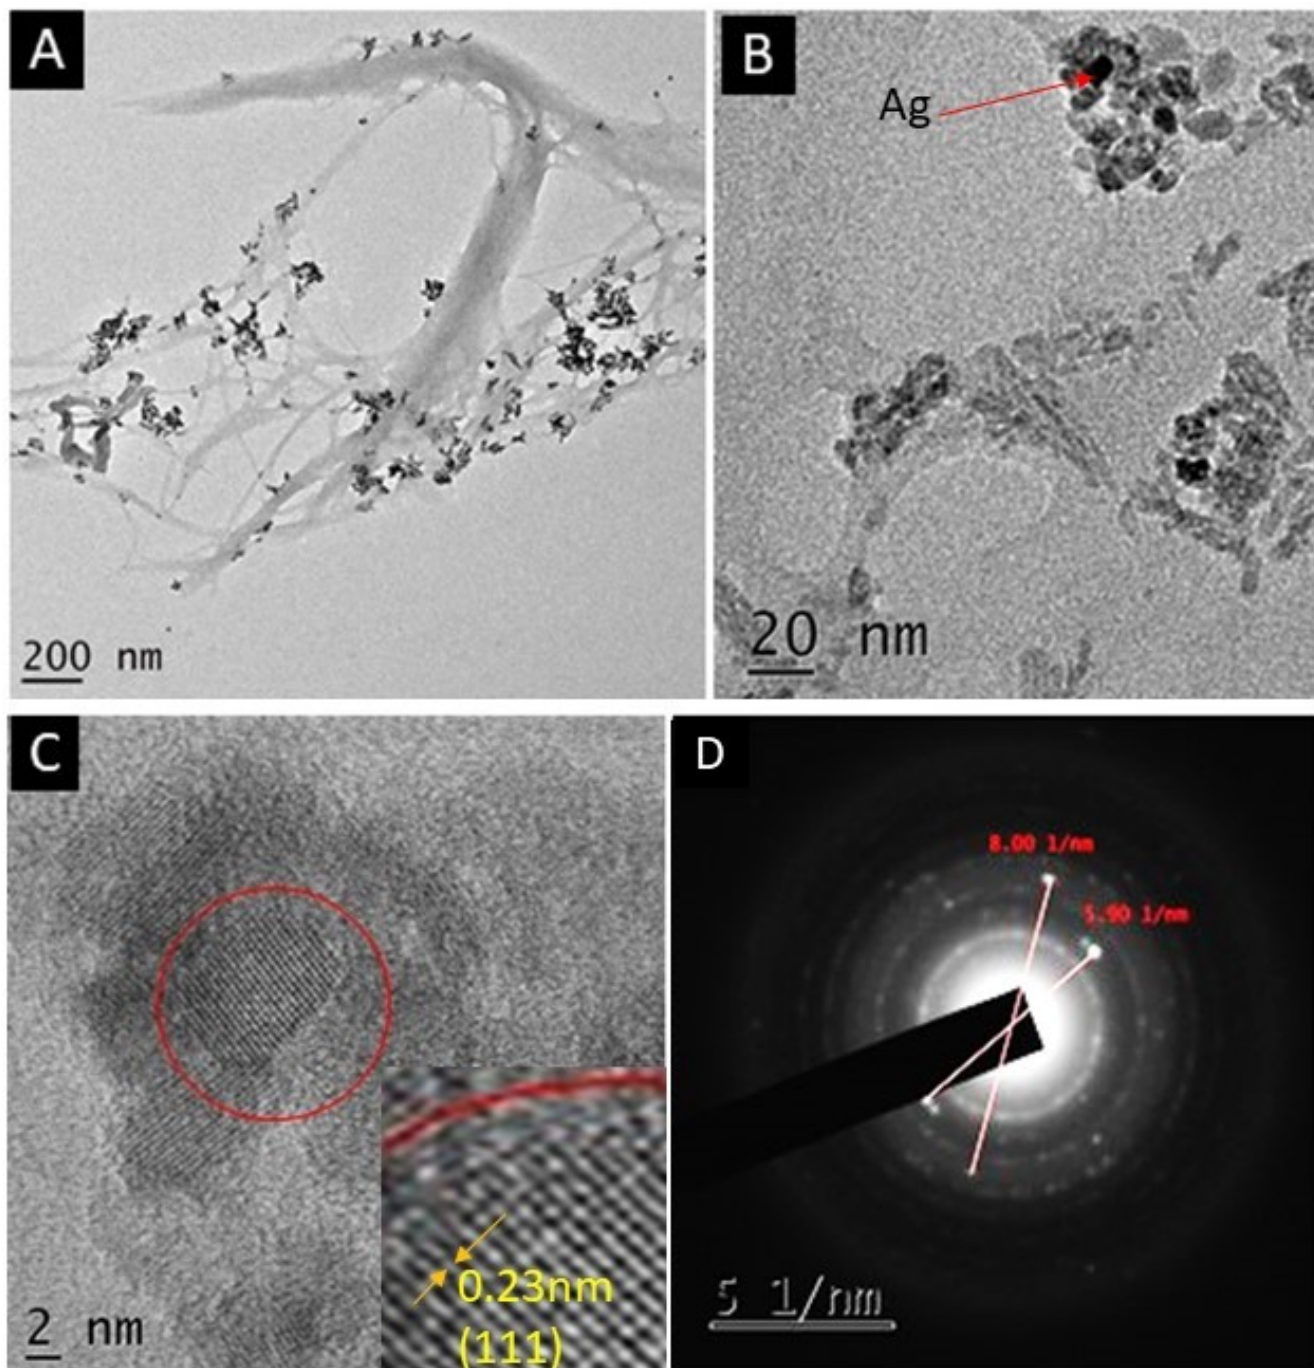

Fig. S2 (A) TEM image of Ag-PANI-NC composite, (B) TEM image of Ag nanoparticles decorated PANI on nanocellulose, (C) HRTEM image showing the crystal lattice spacing of a silver nanoparticle (inset) in the Ag-PANI-NC composite, (D) SAED pattern of Ag-PANI-NC composite.

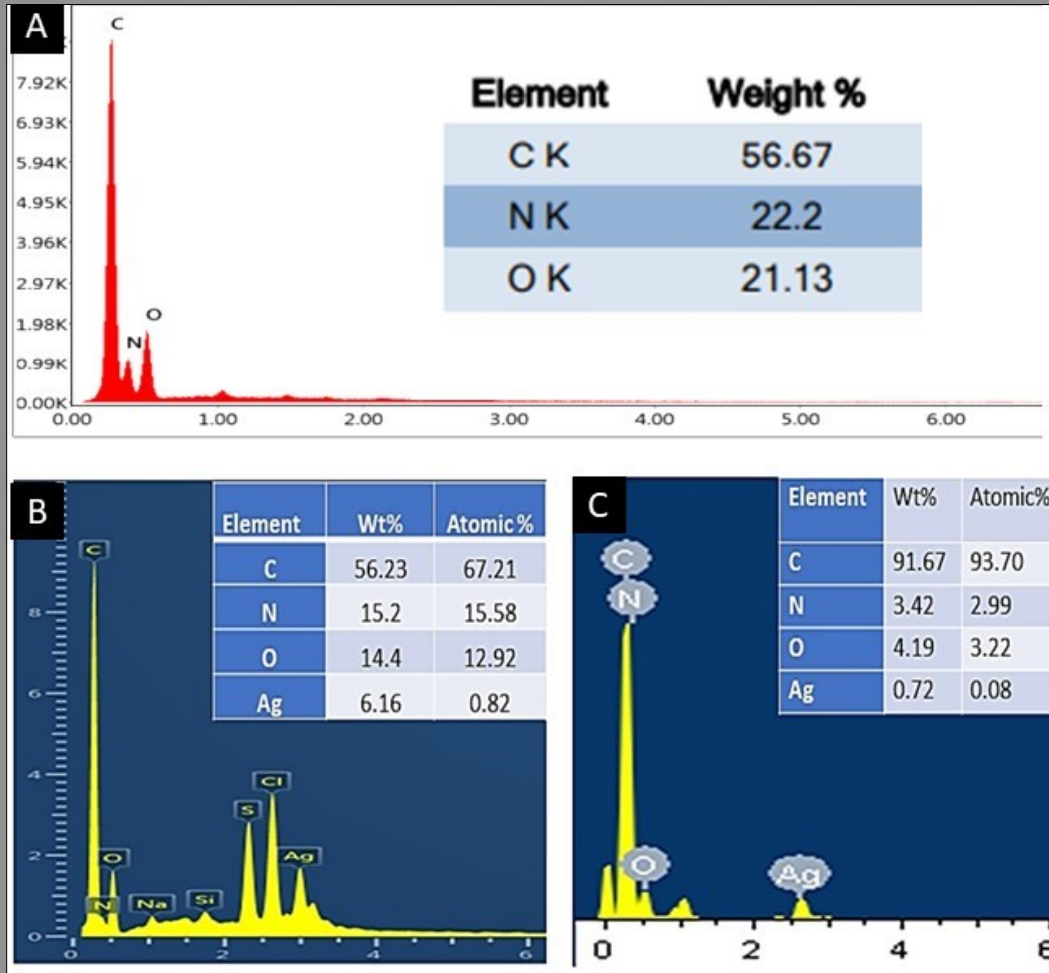

Fig. S3 EDX spectra of (A) PANI-NC, (B) Ag-PANI and (C) Ag-PANI-NC.



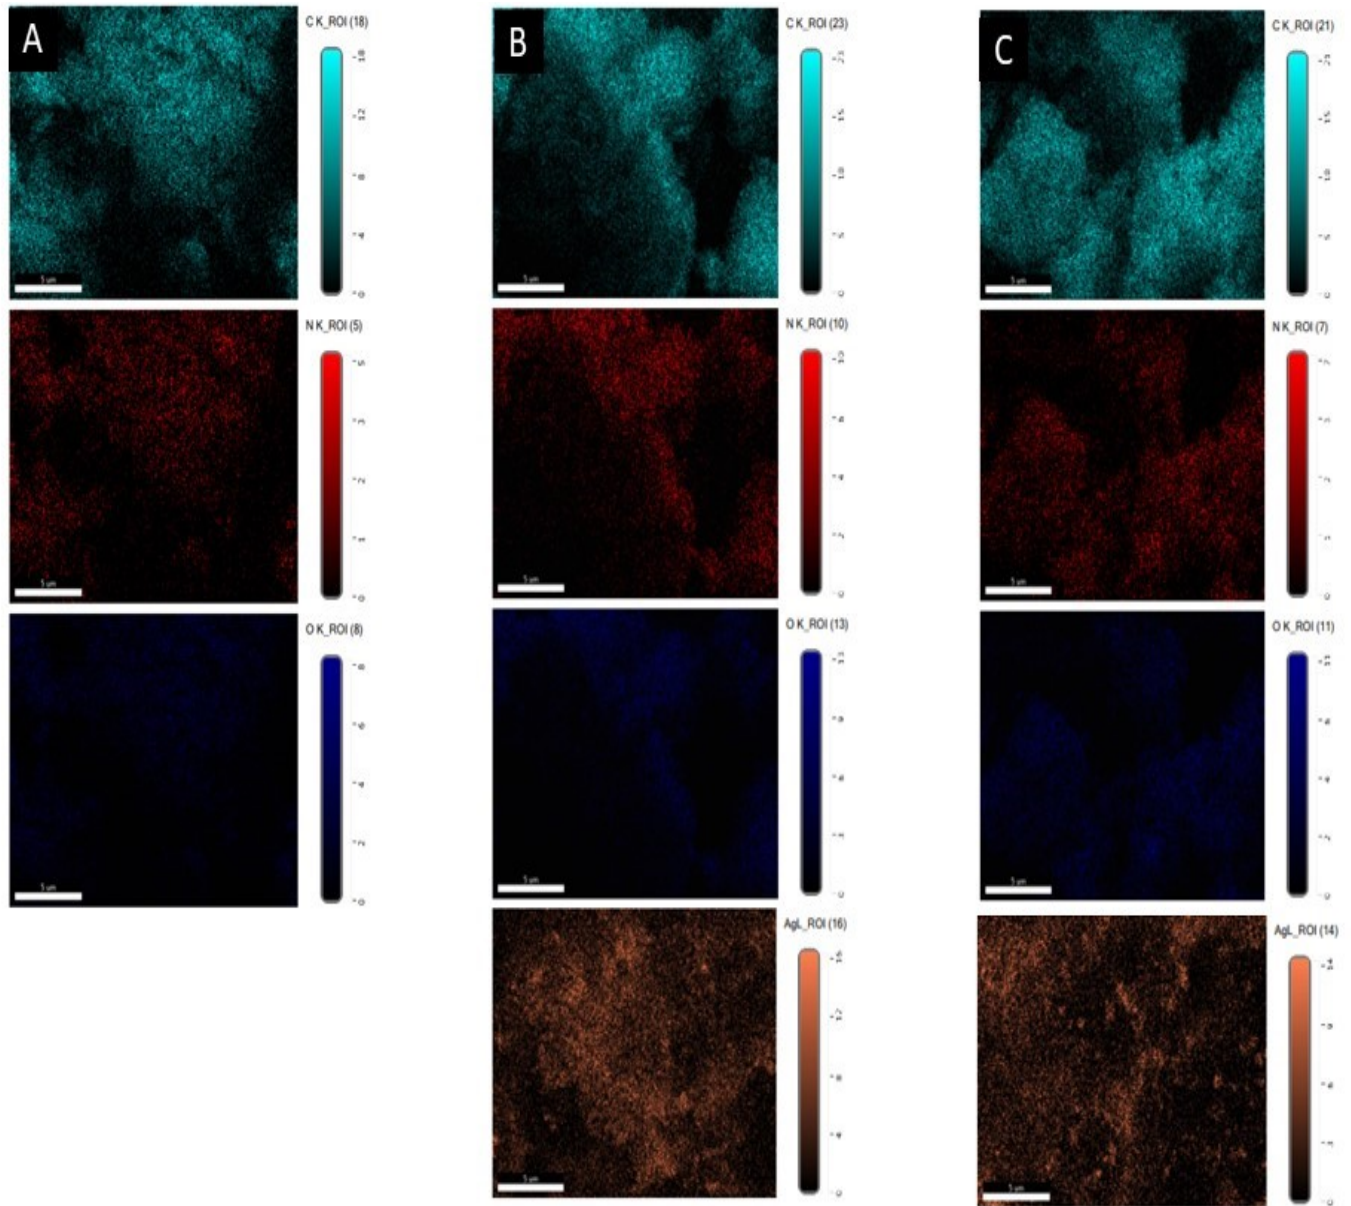

Fig S4: Elemental mapping of (A) PANI-NC, (B) Ag-PANI, (C) Ag-PANI-NC.

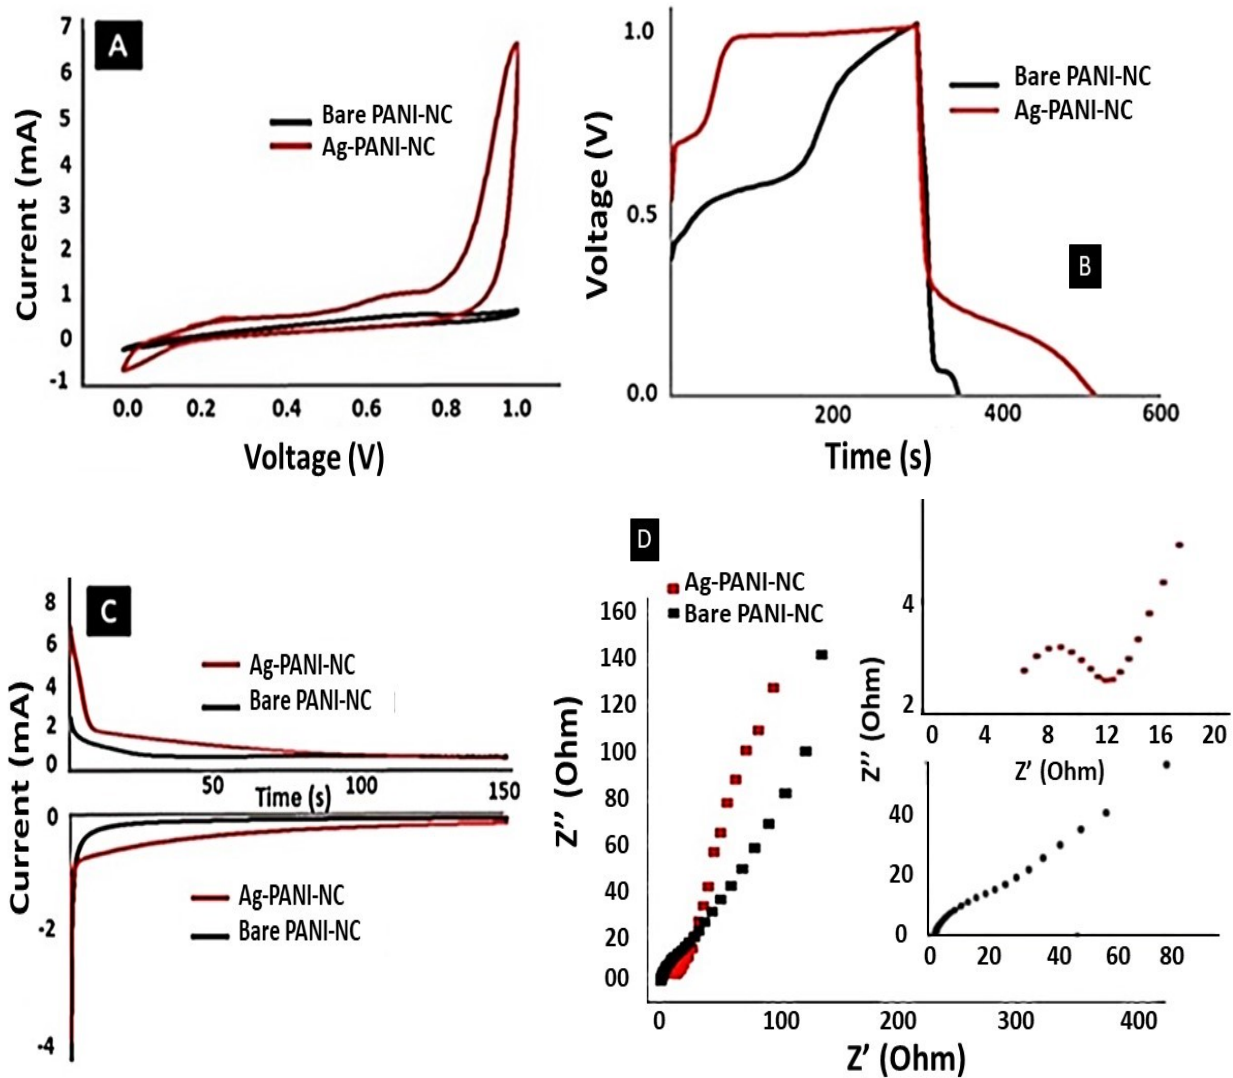

Fig. S5 Comparison of CV (A), GCD (B), CA (C) and EIS (D) graphs of bare PANI-NC (black curve) and Ag - PANI-NC composites (red curve). The inset of Fig. D shows the high frequency region of the EIS spectra of bare PANI-NC (black curve) and Ag-PANI-NC (red curve) in greater detail.

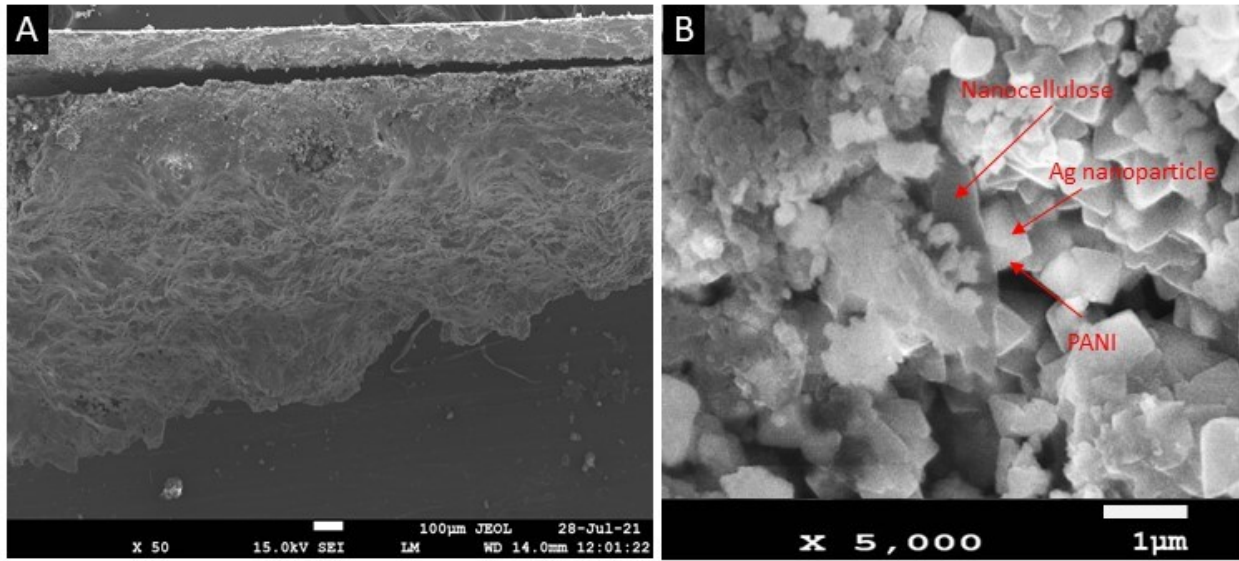

Fig. S6: Cross sectional FESEM images of Ag-PANI-NC at different magnifications.

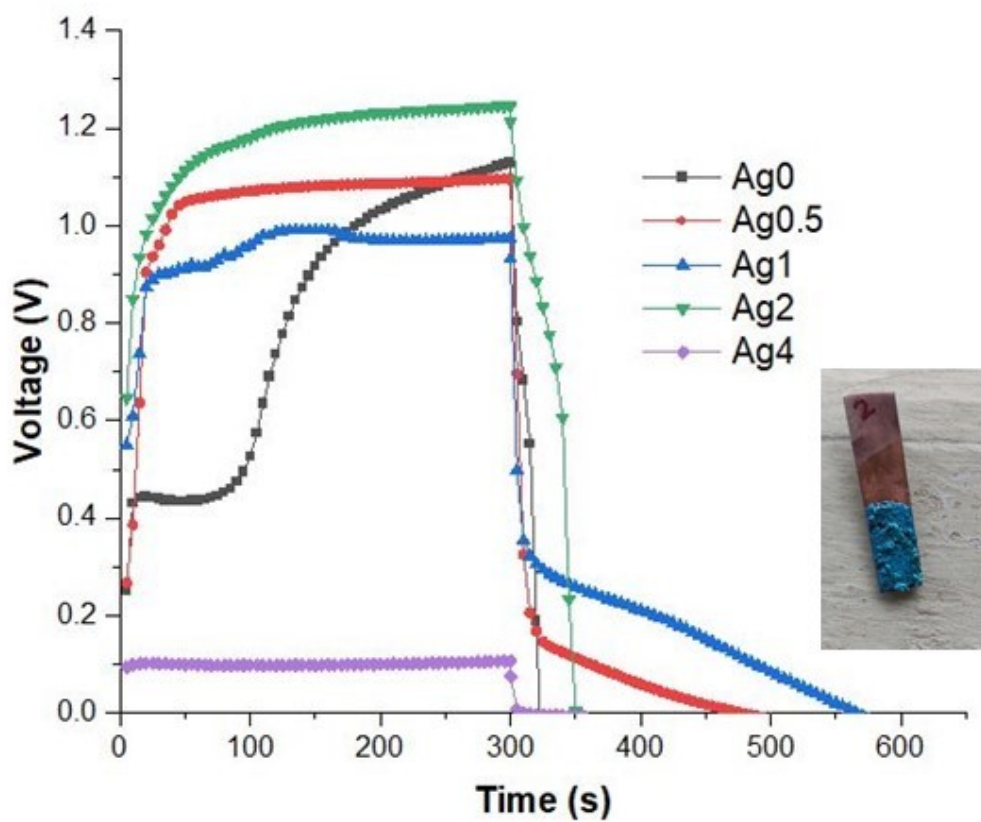

Fig S7: GCD performance comparison of Ag-PANI-NC electrodes with different Ag content. Inset corroded 4% Ag-PANI-NC electrode after the experiment.
